# Supplementary material for: Bi metal-modified Bi4O5I2 hierarchical microspheres with oxygen vacancies for improved photocatalytic performance and mechanism insights
Source: Royal Society of Chemistry journal article supplement (doi:10.1039/c7cy01112a), 2017-01-01
Supplement: c7cy01112a1.pdf [file c7cy01112a1.pdf]

**Bi metal modified Bi<sub>4</sub>O<sub>5</sub>I<sub>2</sub> hierarchical microsphere with oxygen vacancies for  
the improved photocatalytic performance and mechanism insights**

Xiufan Liu, Xuyang Xiong, Shuoping Ding, Qingqing Jiang, Juncheng Hu\*

Key Laboratory of Catalysis and Materials Science of the State Ethnic Affairs Commission & Ministry  
of Education, South-Central University for Nationalities, Wuhan, 430074, P. R. China

\* Corresponding author: [jchu@mail.scuec.edu.cn](mailto:jchu@mail.scuec.edu.cn)

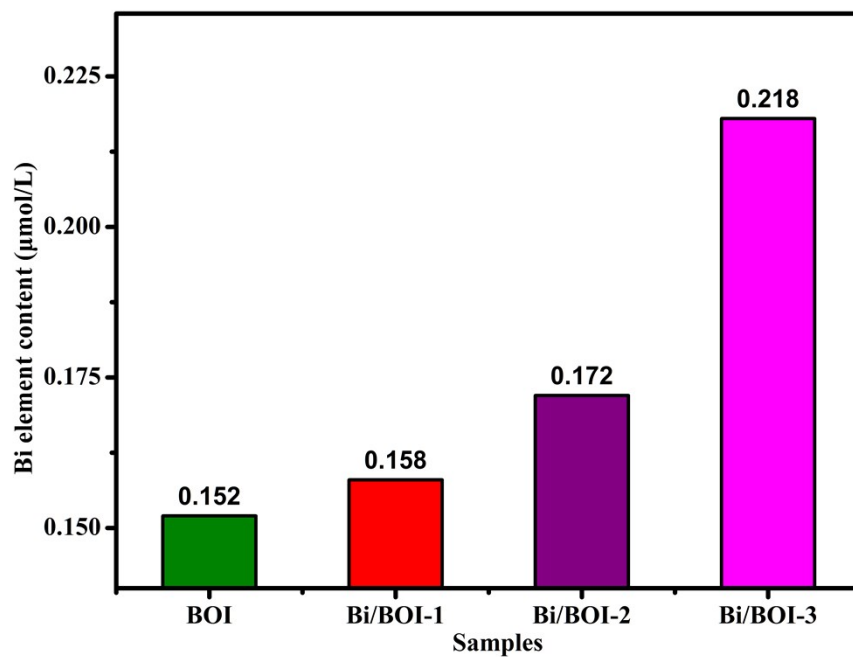

Fig. S1 Bismuth content in BOI, Bi/BOI-1, Bi/BOI-2, and Bi/BOI-3.

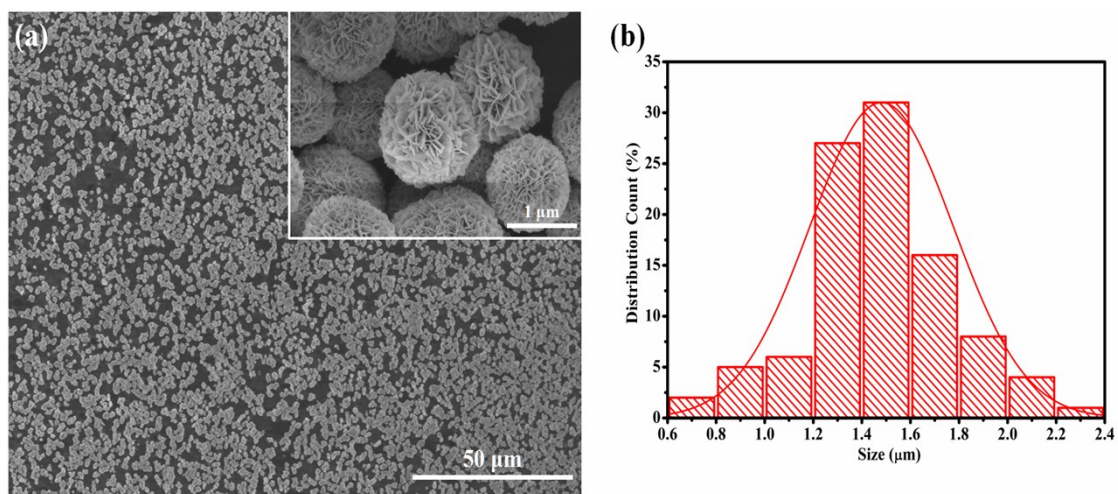

Fig. S2 (a) Low-magnification SEM image of Bi/BOI-2 sample, and magnified SEM image (inset).  
 (b) Size distribution count of the Bi/BOI-2 sample.

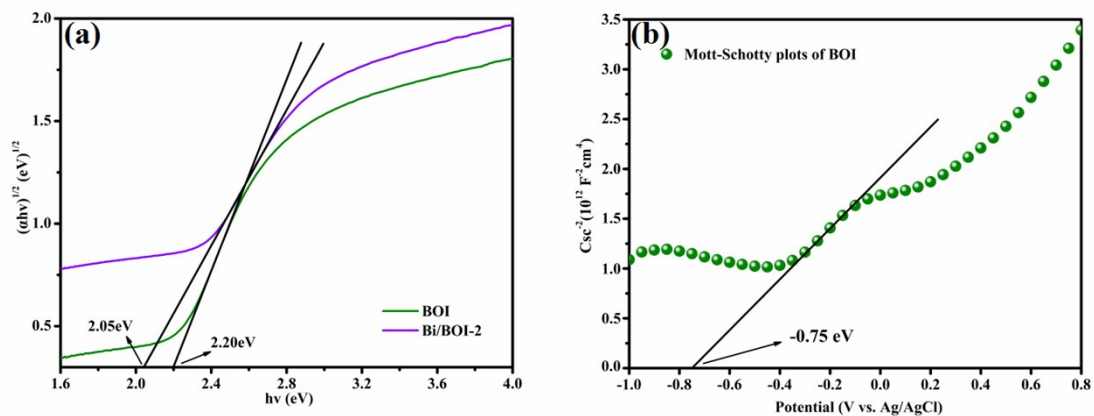

Fig. S3 (a) Transformed Kubelka-Munk function versus light energy over BOI and Bi/BOI-2, (b) Mott-Schottky plots of BOI.

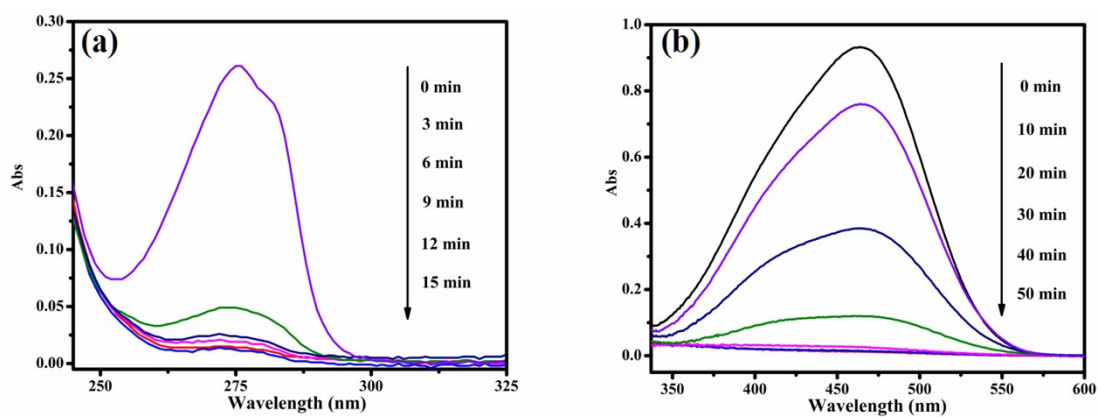

Fig. S4 UV-Vis adsorption spectra of (a) BPA and (b) MO during the degradation process with Bi/BOI-2.

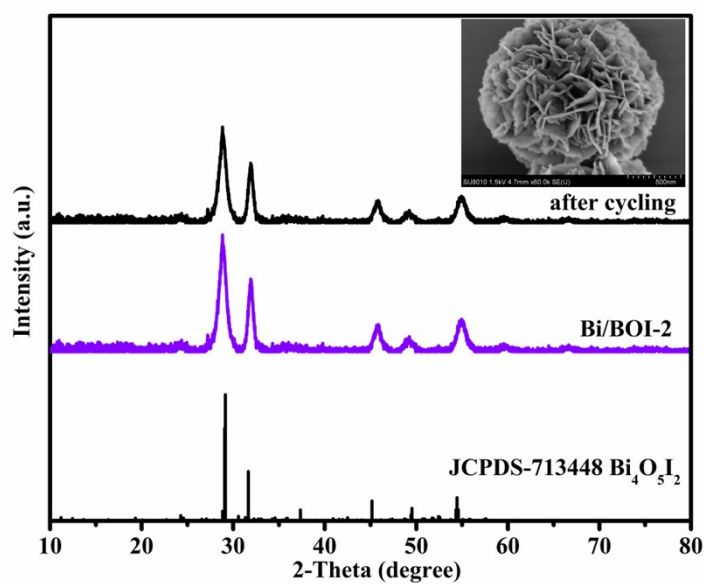

Fig. S5 XRD patterns of Bi/BOI-2 after cycling and the corresponding SEM image (inset).

Table S1 Photocatalytic efficiencies of Bisphenol-A over Bi-based photocatalysts under different conditions.

| Samples                                                                | Solution          | Light source                                                 | photocatalytic efficiency | Ref. |
|------------------------------------------------------------------------|-------------------|--------------------------------------------------------------|---------------------------|------|
| Bi <sub>5</sub> O <sub>7</sub> I<br>(50 mL)                            | 15 mg/L<br>50 ml  | 400 W halogen lamp with a 420 nm cut-off filter              | T <sub>90%</sub> =18 min  | 1    |
| Bi <sub>12</sub> O <sub>15</sub> Cl <sub>6</sub><br>(10 mg)            | 10 mg/L<br>40 mL  | 350 W Xe arc lamp with a 420 nm cut-off filter               | T <sub>90%</sub> = 6h     | 2    |
| Bi <sub>7</sub> O <sub>9</sub> I <sub>3</sub><br>(50 mg)               | 20 mg/L<br>50 mL  | 1000 W Xe lamp combined with a 420 nm cut-off filter         | T <sub>90%</sub> = 60 min | 3    |
| Bi/BiOI<br>(5 mg)                                                      | 20 mg/L<br>10 ml  | 350 W Xe lamp with light intensity of 5.8 mW/cm <sup>2</sup> | T <sub>90%</sub> = 60 min | 4    |
| g-C <sub>3</sub> N <sub>4</sub> /BiOI<br>(50 mg)                       | 20 mg/L<br>100 mL | 300 W Xe lamp with a 400 nm cutoff filter                    | T <sub>90%</sub> =60 min  | 5    |
| Bi <sub>12</sub> O <sub>17</sub> Cl <sub>2</sub><br>(20 mg)            | 10 mg/L<br>40 mL  | 500 W Xe arc lamp with a 420 nm cut-off filter               | T <sub>90%</sub> =120 min | 6    |
| BiOI/BiOCl<br>(50 mg)                                                  | 20 mg/L<br>50 mL  | 1000 W Xe lamp with a 420 nm cut-off filter                  | T <sub>90%</sub> = 20 min | 7    |
| BiOBr/Bi <sub>12</sub> O <sub>17</sub> Cl <sub>2</sub><br>2<br>(30 mg) | 10 mg/L<br>50 mL  | 500 W Xe lamp                                                | T <sub>73%</sub> = 4h     | 8    |
| CQD-Bi <sub>2</sub> MoO <sub>6</sub><br>100 mg                         | 10 mg/L<br>100 mL | 300 W Xe with a 400 nm cut-off filter                        | T <sub>88%</sub> = 2h     | 9    |
| BiOI/Bi <sub>12</sub> O <sub>17</sub> Cl <sub>2</sub><br>50 mg         | 10 mg/L<br>50 mg  | 500 W Xe lamp with 420 nm cut-off filter                     | T <sub>90%</sub> = 2h     | 10   |

#### Reference

- 1 Y. B. Liu, G. Q. Zhu, J. Z. Gao, R. L. Zhu, M. Hojamberdiev, C. H. Wang, X. M. Wei, P. Liu, *Appl. Catal. B*, 2017, **205**, 421-432.
- 2 C. Y. Wang, X. Zhang, X. N. Song, W. K. Wang, H. Q. Yu, *ACS Appl. Mater. Interfaces*, 2016, **8**, 5320-5326.
- 3 X. Xiao, R. Hao, X. X. Zuo, J. M. Nan, L. S. Li, W. D. Zhang, *Chem. Eng. J.*, 2012, **209** 293-

- 4 C. Chang, L. Y. Zhu, Y. Fu, X. L. Chu, *Chem. Eng. J.*, 2013, 233, 305-314.
- 5 J. Di, J. X. Xia, S. Yin, H. Xu, Y. G. Xu, M. Q. He, H. M. Li, *J. Mater. Chem. A*, 2014, **2**, 5340-5351.
- 6 C. Y. Wang, X. Zhang, H. B. Qiu, W. K. Wang, G. X. Huang, J. Jiang, H. Q. Yu, *Appl. Catal. B*, 2017, **200**, 659-665.
- 7 X. Xiao, R. Hao, M. Liang, X. X. Zuo, J. M. Nan, L. S. Li, W. D. Zhang, *J. hazard. mater.*, 2012, **233**, 122-130.
- 8 L. Hao, H. W. Huang, Y. X. Guo, X. Du, Y. H. Zhang, *Appl. Sur. Sci.*, 420, 2017, 303-312.
- 9 J. Di, J. X. Xia, M. X. Ji, H. P. Li, H. Xu, H. M. Li, R. Chen, *Nanoscale*, 2015, **7**, 11433-11443.
- 10 H. W. Huang, K. Xiao, Y. He, T. R. Zhang, F. Dong, X. Du, Y. H. Zhang, *Appl. Catal. B*, 2016, **199**, 75-86.

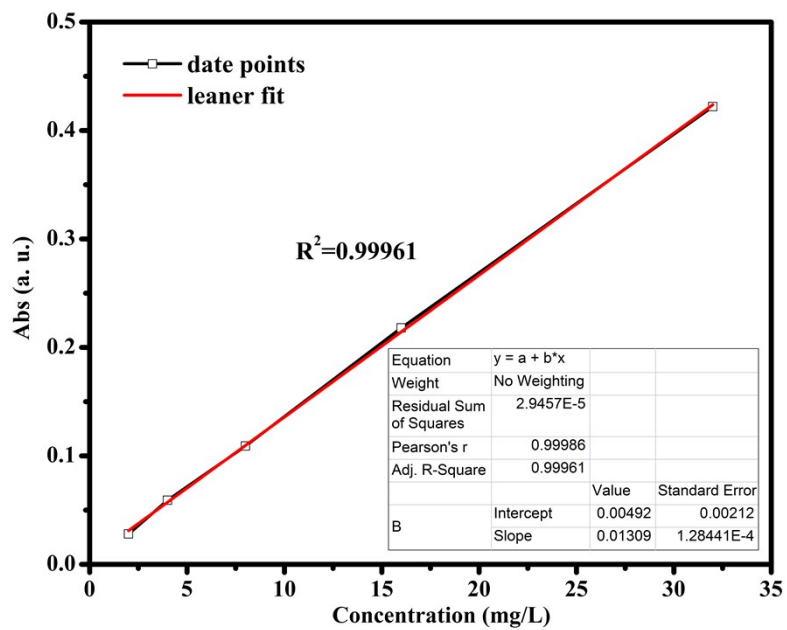

Fig. R1 The standard curve of Abs vs. BPA concentration

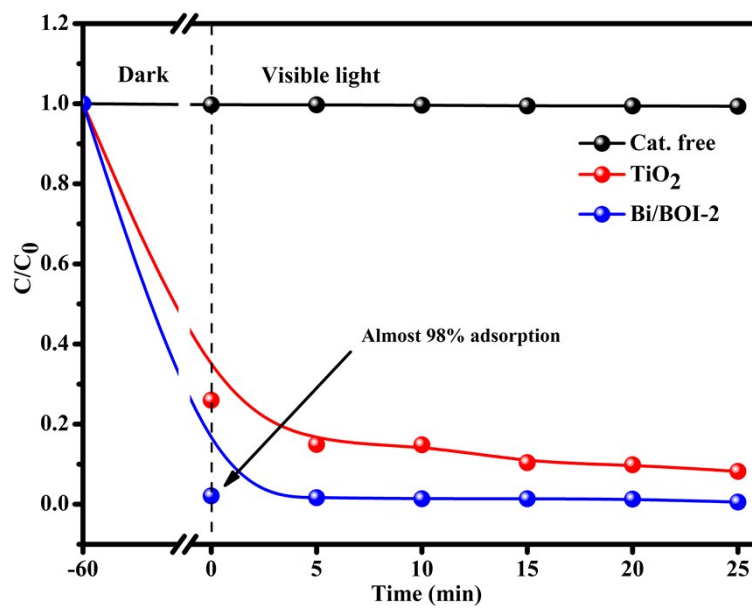

Fig. R2  $C_t/C_0$  versus time curves of CR under visible light irradiation
